# Supplementary material for: An Adenoviral Vector as a Versatile Tool for Delivery and Expression of miRNAs
Source: MDPI journal article supplement (doi:10.3390/v14091952), 2022-09-02
Supplement: s1 [file s1]

## Supplementary Material

### An adenoviral vector as a versatile tool for delivery and expression of miRNAs

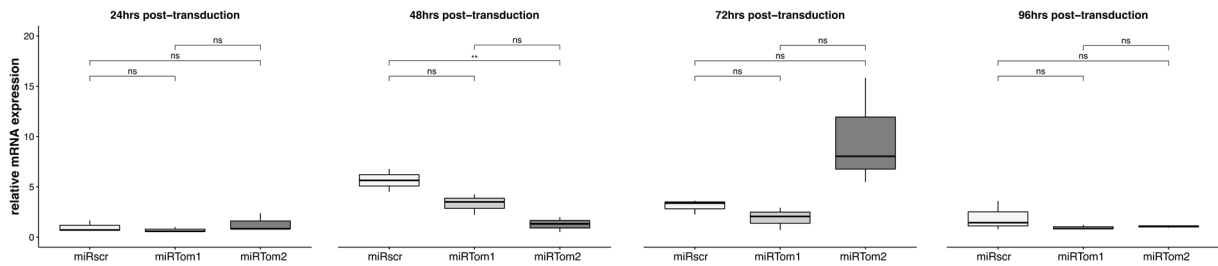

**Figure S1: Stable co-cistronic expression of EGFP reporter gene over 96 hpt.** We monitored Ad5dE1-driven, co-cistronic expression of EGFP over 96 h using quantitative PCR. The expression level of EGFP oscillated only slightly over time and was independent of inserted miRNA (96 hpt: miRScr 1.94-fold over 24 hpt; miRTom1 0.97-fold over 24 hpt; miRTom2 1.06-fold over 24 hpt). hpt, hours post-transduction; ns,  $p > 0.05$ ; \*\*,  $p < 0.01$ .

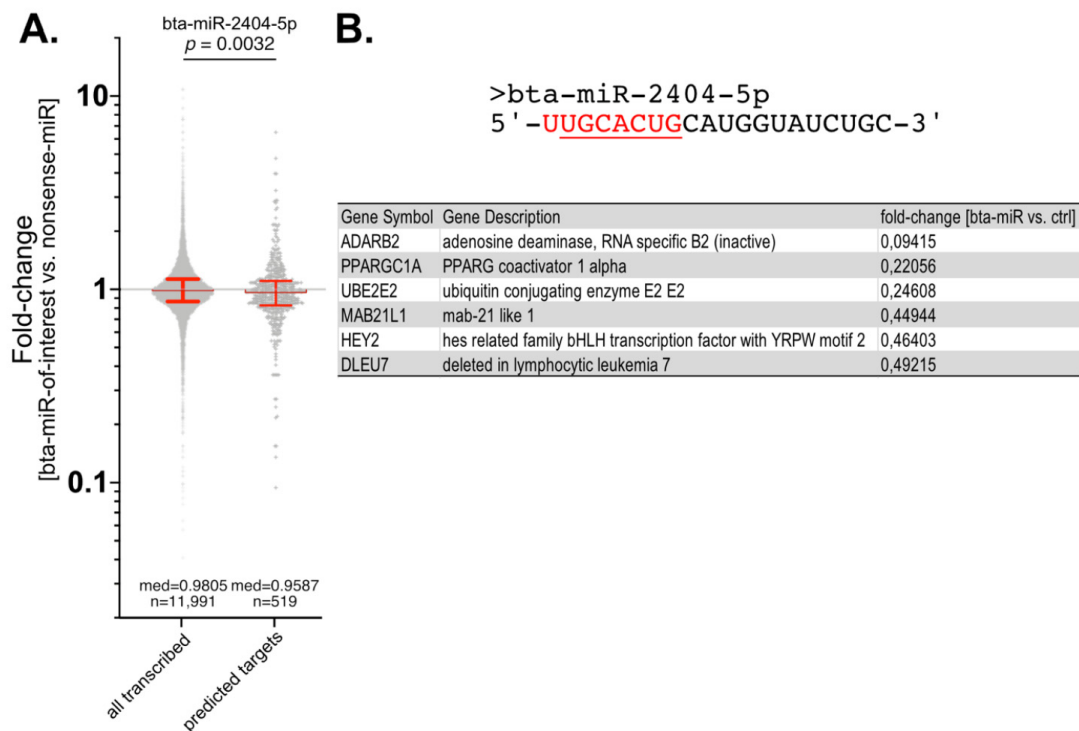

**Figure S2: Effects of Ad5-mediated expression of bta-miR-2404-5p.** The cattle-specific miRNA bta-miR-2404-5p that does not occur in human was used to target endogenous mRNAs. Putative human targets for bta-miR-2404-5p were predicted using the 'custom prediction' option of miRDB\* (<http://mirdb.org/mirdb/index.html>). **A.** Effects of Ad5-mediated expression of bta-miR-2404-5p were studied in HIEC-6 in comparison to HIEC-6 expressing an Ad5-mediated nonsense-miR. Relative fold-changes were compared for the whole HIEC-6 transcriptome and the lists of expressed predicted targets. Predicted targets for each bta-miR comprised of hundreds of mRNAs. Statistical power calculations were done using the nonparametric Wilcoxon–Mann–Whitney method and GraphPad Prism 8.4.3 software. **B.** Sequence of bta-miR-2404-5p. miRDB considers nucleotides 1-8 (red) for putative target interactions within the 3'-UTR of mRNAs, whereas mainly the seed region comprises of nucleotides 2-8 (underlined). Below is a list of experimentally confirmed targets exhibiting fold changes below 0.5x that were previously predicted using miRDB.

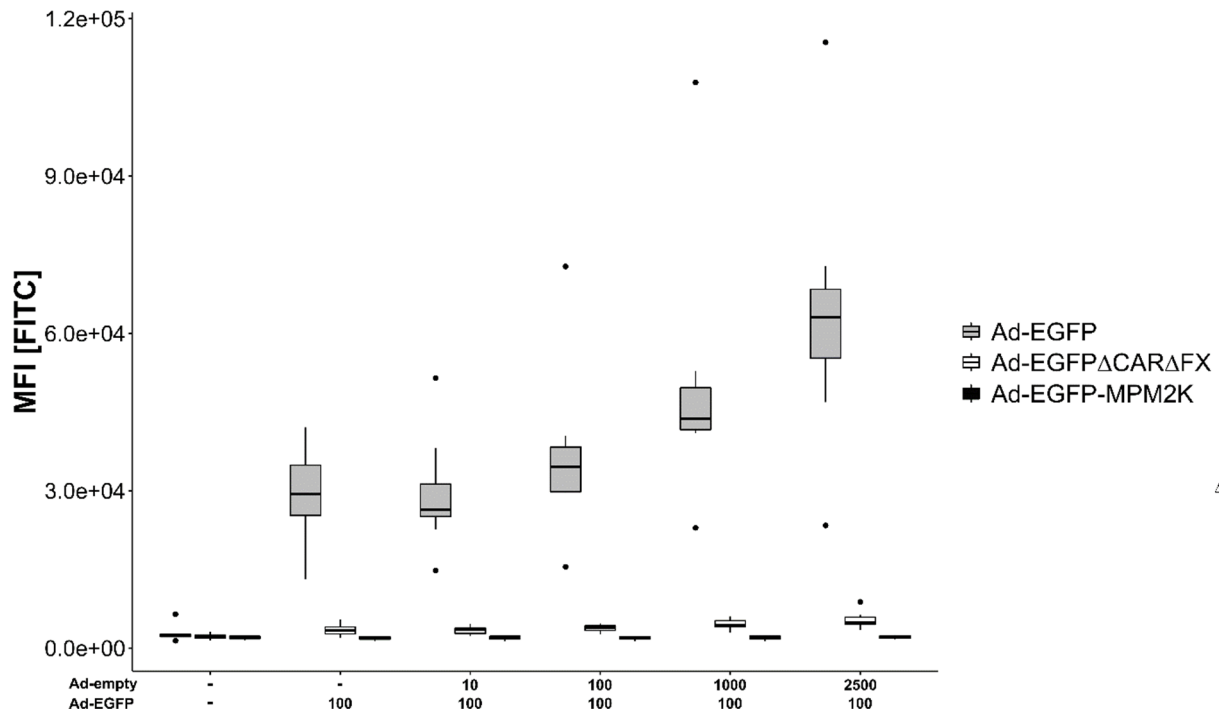

**Figure S3: Direct comparison of transgene expression driven from different Ad-EGFP vectors.**

A549 cells were transduced with escalating doses of Ad-empty followed by transduction with an EGFP-expressing vector. Compared to Ad-EGFP, transgene expression from Ad-EGFPΔCARΔFX was significantly reduced due to its ablated binding to CAR [50]. The enhancing effect of Ad-empty co-transduction was similar for Ad-EGFP and Ad-EGFPΔCARΔFX. EGFP expression driven from Ad-EGFP/MPM2K was not detectable. MFI, mean fluorescence intensity.

**Table S1 Primers used for PCR amplification and homologous recombination.** Homology arms are displayed *italic*. Tan, annealing temperature.

| target                                                        |         | homology arms ( <i>italic</i> ) | 5' - 3'                                                                                                                                                                                                     | Tan     |
|---------------------------------------------------------------|---------|---------------------------------|-------------------------------------------------------------------------------------------------------------------------------------------------------------------------------------------------------------|---------|
| miR expression cassette                                       | forward | Ad5 bp 391-440 (AY339865)       | <i>AGGTGTTTTCTCAGGTGTTTTCCGCGTTCCGGGTCAAAGTTGGCGTTTT</i> tctgcttagggtaggcgtt                                                                                                                                | 63.5 °C |
| miR expression cassette                                       | reverse | Ad5 bp 3522-3571 (AY339865)     | <i>ATAAGACCCACCTTATATATTCTTTCCACCCCTTAAGCCACGCCACA</i> gctgccaggaacagctatg                                                                                                                                  | 63.5 °C |
| rps1neo counter-selection marker                              | forward | miRNA cassette                  | <i>G TAGTGAGTCGACCAGTGGATCCTGGAGGCTTGCTGAAGGCTGTATGCTG</i> ggcctgggtgatgagcggggatcg                                                                                                                         | 65°C    |
| rps1neo counter-selection marker                              | reverse | miRNA cassette                  | <i>ATCTGGGCCATTGTTCATGTGAGTGTAGTAACAGGCCTTGTCCTG</i> tcagaagaactcgtcaagaaggcg                                                                                                                               | 65°C    |
| inserted miRNA oligo                                          | forward | none                            | ggatcactctcggcatggac                                                                                                                                                                                        | 58°C    |
| inserted miRNA oligo                                          | reverse | none                            | attgccgtcatagcgcgggt                                                                                                                                                                                        | 58°C    |
| miRNA-Tom1 ( <i>target</i> , <i>loop</i> , <i>revTarget</i> ) | oligo   | miRNA cassette                  | <i>G TAGTGAGTCGACCAGTGGATCCTGGAGGCTTGCTGAAGGCTGTATGCTG</i> <u><i>TACTGTTCCACGATGGTGTAG</i></u><br><i>GTTTTGGCCACTGACTGACCTACACCAGTGGAAACAGTACAGGACACAAGGCCTGTACTAGCACTCACATGG</i><br><i>AACAAATGGCCAGAT</i> | -       |
| miRNA-Tom2 ( <i>target</i> , <i>loop</i> , <i>revTarget</i> ) | oligo   | miRNA cassette                  | <i>G TAGTGAGTCGACCAGTGGATCCTGGAGGCTTGCTGAAGGCTGTATGCTG</i> <u><i>TTGGTGTCACGTAAGTAG</i></u><br><i>GTTTTGGCCACTGACTGACCTACTACTGTGGACACCAACAGGACACAAGGCCTGTACTAGCACTCACATGG</i><br><i>AACAAATGGCCAGAT</i>     | -       |
